# Supplementary material for: Identification of novel sulfur-containing derivatives of chlorophyll a in a Recent sedimentElectronic supplementary information (ESI) available: 1H NMR data. See http://www.rsc.org/suppdata/cc/b2/b212243j/
Source: Royal Society of Chemistry journal article supplement (doi:10.1039/b212243j), 2003-02-10
Supplement: b212243j.doc [file b212243j.doc]

Electronic supplementary information

1H NMR*a*  0.74 (dd, 6 H, H-P71, P111), 0.81 (d, 6 H, *J* 7, H-P16, P151), 0.83 – 1.00 (m, CH2s-P), 1.40 – 1.60 (m, H-P7, P11), 1.45 (m, 1 H, H-P15), 1.48 (s, 3 H, H-P3’), 1.70 (t, 3 H, *J* 8, H-82), 1.79 (m, 2 H, H-P4), 1.83 (dd, 3 H, *J* 4, H-181), 2.18 (s, 3 H, SCH3-31), 2.28 (d, 3 H, *J* 7, H-32), 2.32 (m, H-172’), 2.40 (m, H-171’), 2.51 (m, H-172), 2.70 (m, H-171), 3.30 (s, 3 H, H-71), 3.50 (s, 3 H, H-21), 3.68 (s, 3 H, H-121), 3.78 (q, 2 H, *J* 8, H-81), 3.87 (s, 3 H, CO2CH3-132), 4.20 (m, H-P11), 4.22 (m, H-17), 4.35 (m, H-P1), 4.63 (m, H-18), 4.93 (m, H-P2), 5.65 (q, 1 H, *J* 7, H-31), 6.33 (s, 1 H, H-132), 8.87 (s, 1 H, H-20), 9.84 (s, 1 H, H-10), 9.89 (s, 1 H, H-5).

*a*Assignments prefixed by P refer to positions on the phytyl chain.
